# Supplementary material for: Risk factors for bronchopulmonary dysplasia in preterm infants: a systematic review and meta-analysis
Source: PeerJ journal article supplement (doi:10.7717/peerj.20202), 2025-10-10
Supplement: SI21.pdf [file SI21.pdf]

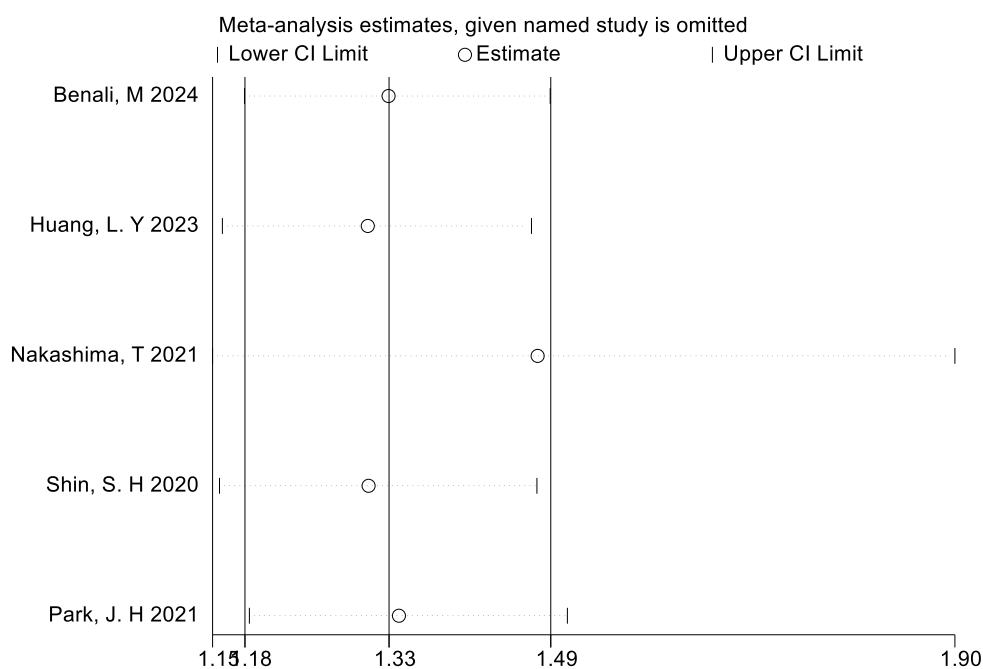

**Figure A. Sensitivity analysis plot for CA**

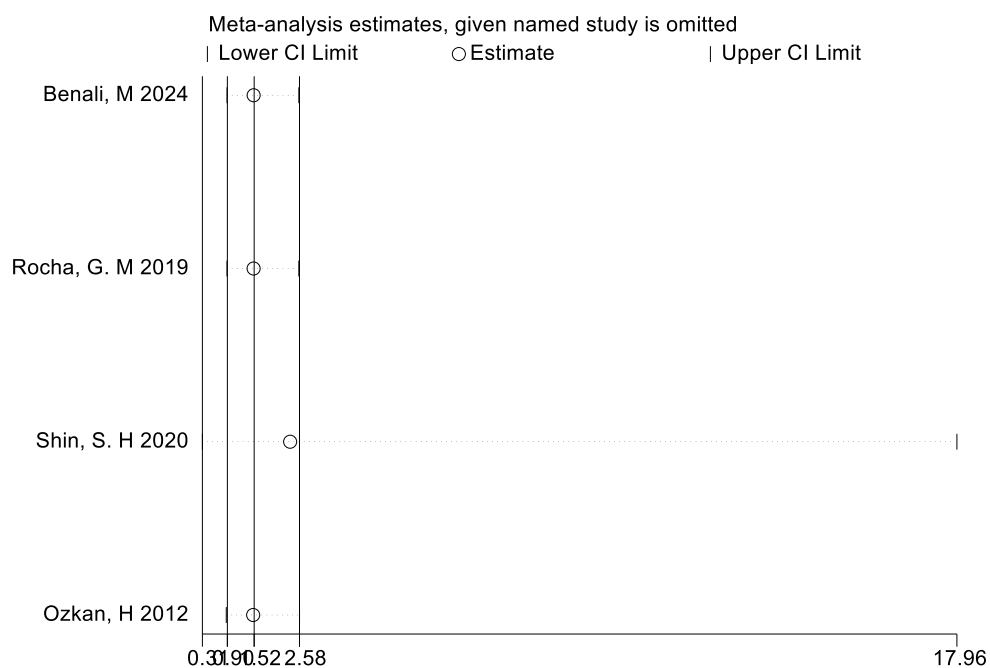

**Figure B. Sensitivity analysis plot for HDP**

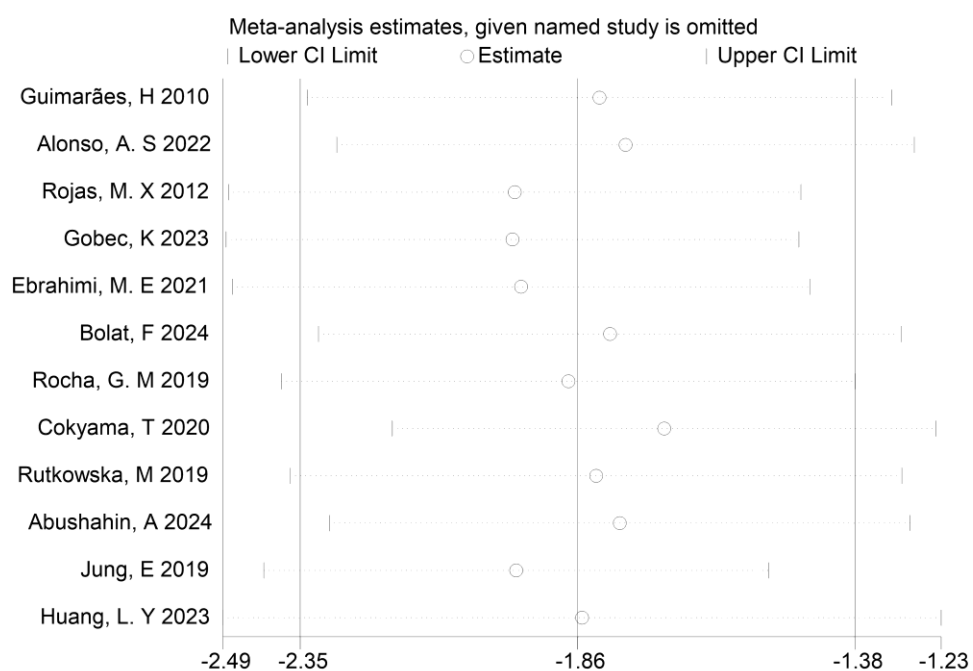

**Figure C. Sensitivity analysis plot for GA**

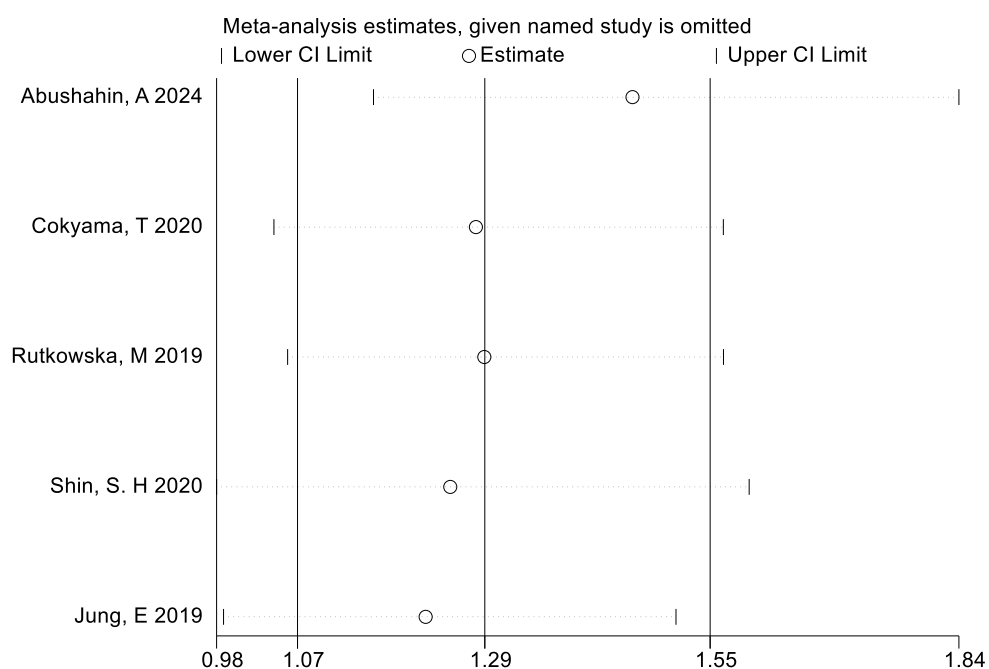

**Figure D. Sensitivity analysis plot for male**

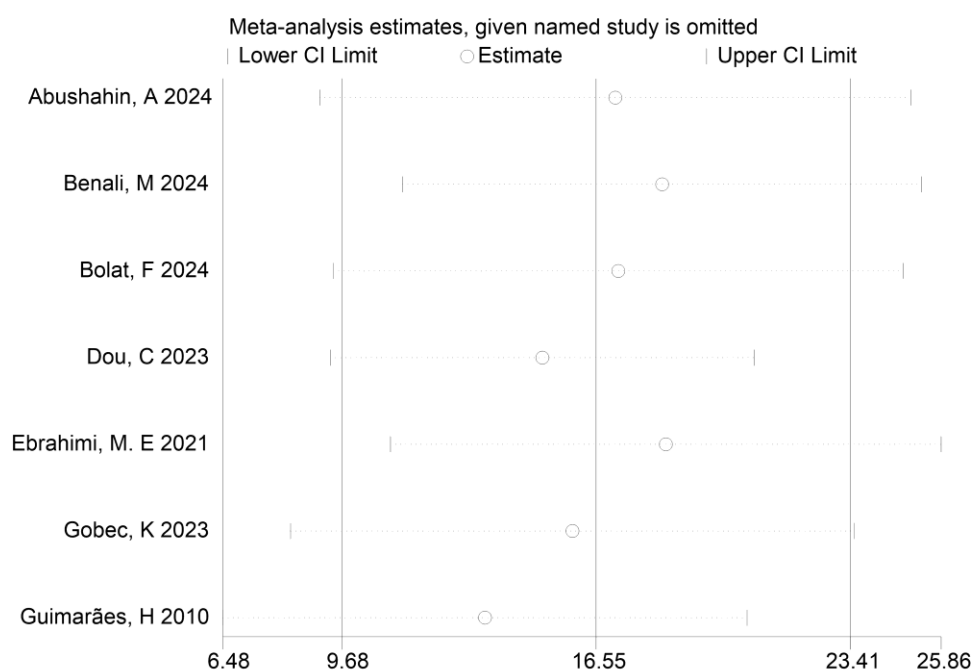

**Figure E. Sensitivity analysis plot for MV**

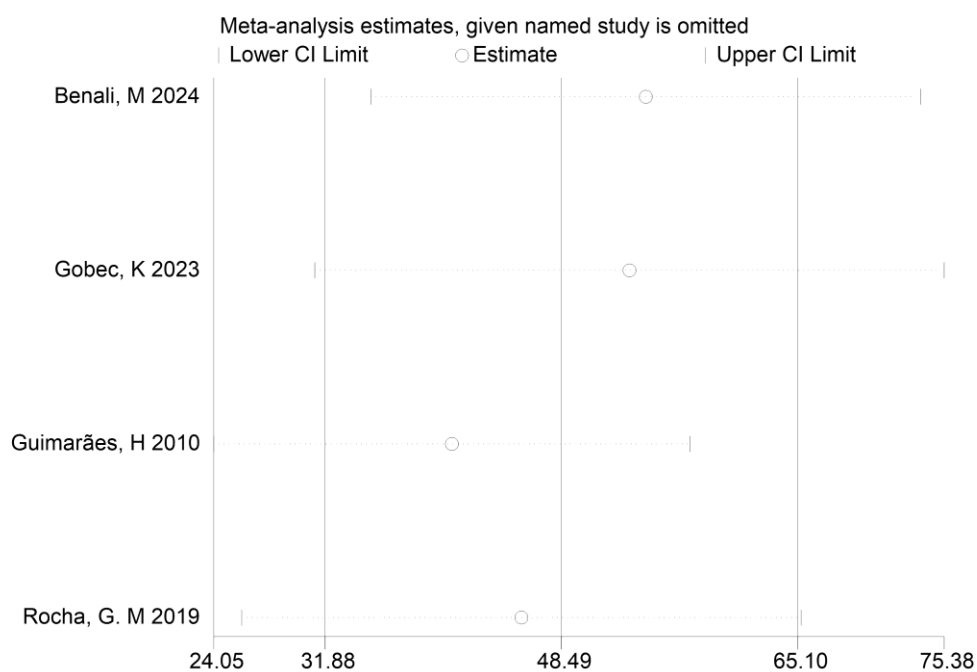

**Figure F. Sensitivity analysis plot for oxygen administration**

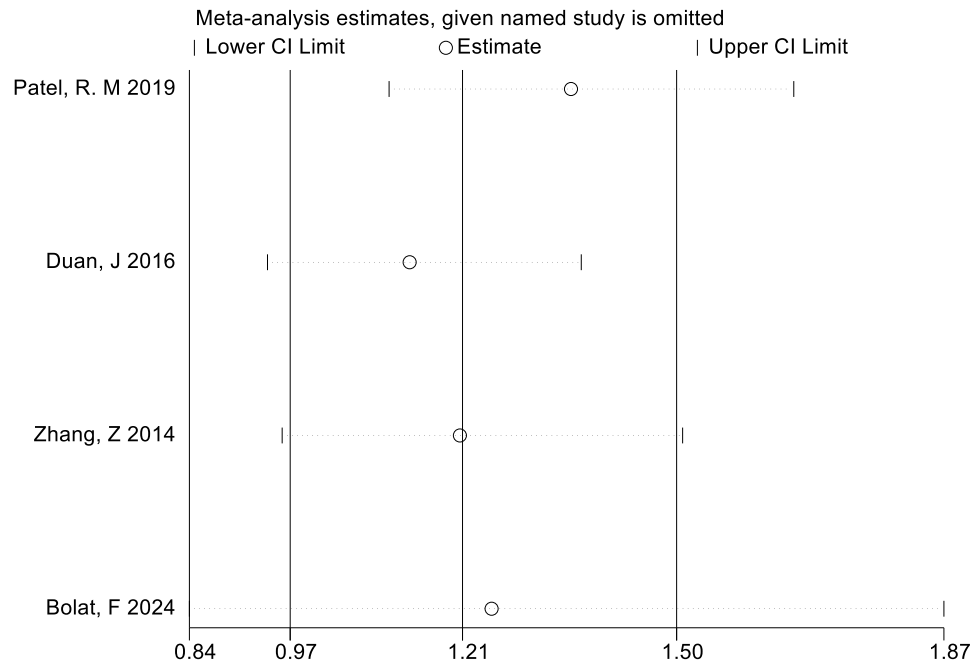

**Figure G. Sensitivity analysis plot for blood transfusion**

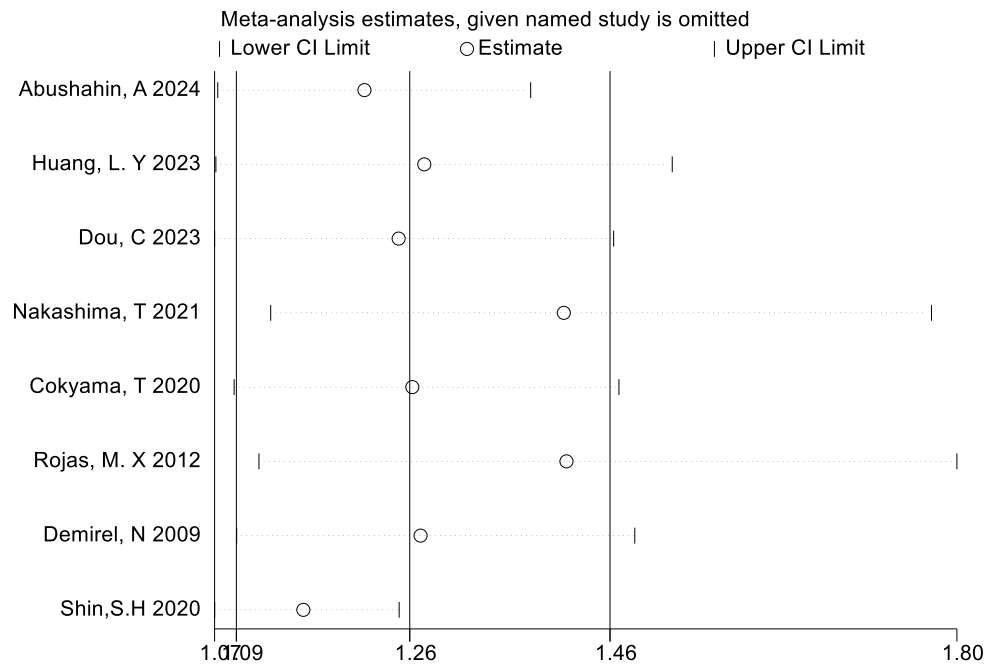

**Figure H. Sensitivity analysis plot for PDA**

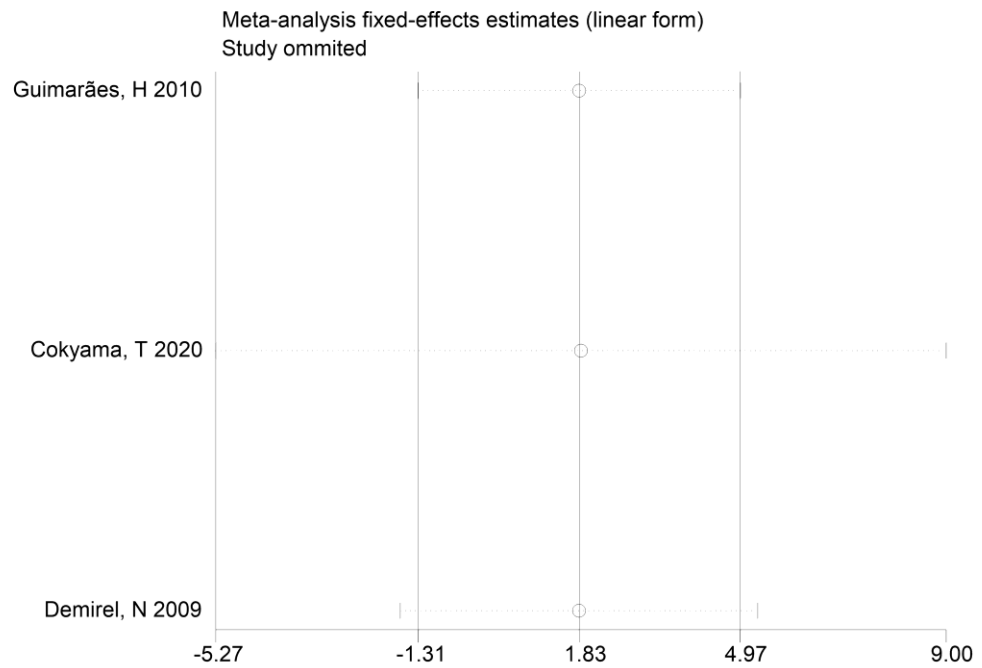

**Figure I. Sensitivity analysis plot for RDS**

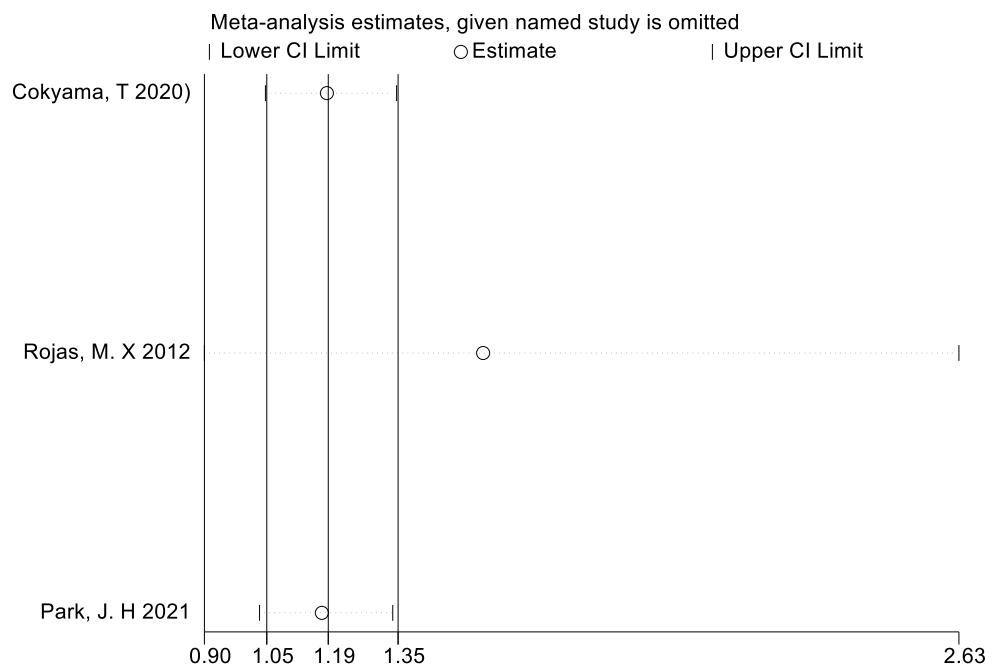

**Figure J. Sensitivity analysis plot for PROM**

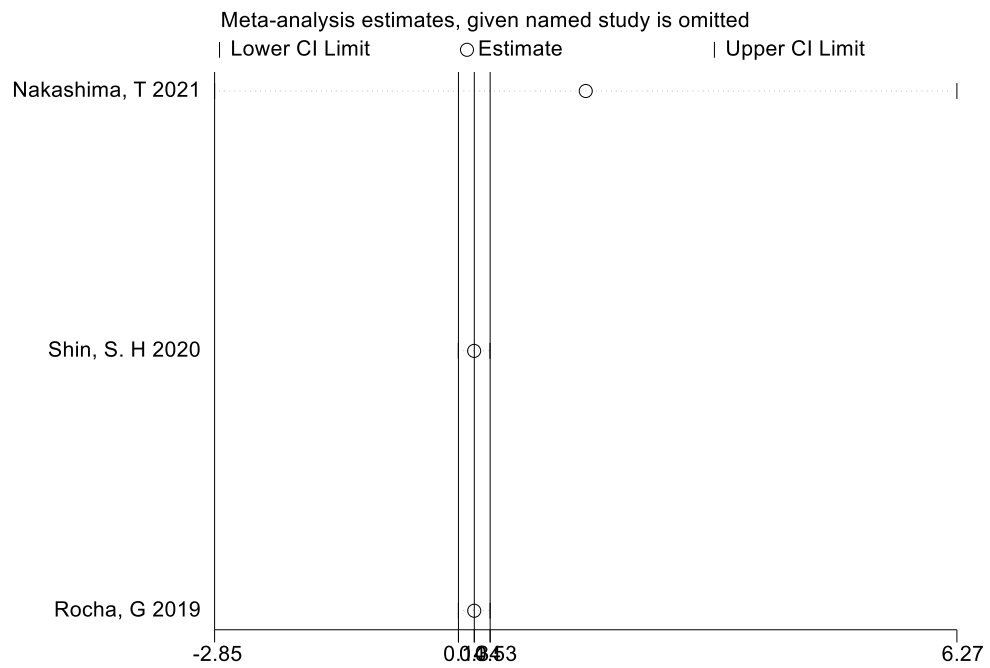

**Figure K. Sensitivity analysis plot for SGA**

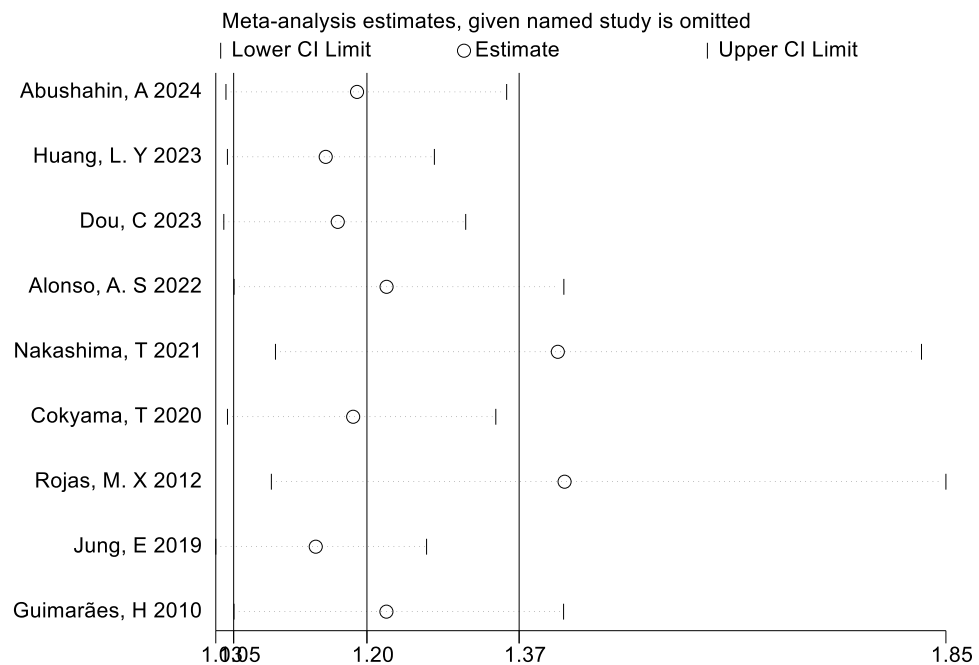

**Figure L. Sensitivity analysis plot for sepsis**
